# Supplementary material for: Inhaled treprostinil in patients with pulmonary hypertension associated with interstitial lung disease with less severe haemodynamics: a post hoc analysis of the INCREASE study
Source: PubMed Central journal article supplement — BMJ Open Respir Res. 2024 Mar 22;11(1):e002116. doi: 10.1136/bmjresp-2023-002116 (PMC10961504; doi:10.1136/bmjresp-2023-002116), 2024-03-22
Supplement: bmjresp-11-1-s001.pdf [file bmjresp-11-1-s001.pdf]

**Supplemental materials**

**Table S1. Baseline Characteristics, PVR <4 WU and ≥4 WU**

|                                         | PVR <4 WU        |                 |                          |                             | PVR ≥4 WU         |                  |                          |                             |
|-----------------------------------------|------------------|-----------------|--------------------------|-----------------------------|-------------------|------------------|--------------------------|-----------------------------|
|                                         | RCT iTre<br>n=32 | RCT PBO<br>n=34 | OLE<br>iTre→iTre<br>n=27 | OLE<br>PBO→<br>iTre<br>n=26 | RCT iTre<br>n=131 | RCT PBO<br>n=129 | OLE<br>iTre→iTre<br>n=92 | OLE<br>PBO→<br>iTre<br>n=95 |
| Age, years, mean (SD)                   | 63.8 (11.9)      | 68.0 (9.8)      | 63.0 (11.9)              | 67.6 (10.3)                 | 65.9 (12.9)       | 67.2 (11.6)      | 66.6 (13.2)              | 68.2 (11.5)                 |
| <65 years, n (%)                        | 16 (50.0)        | 10 (29.4)       | 15 (55.6)                | 8 (30.8)                    | 49 (37.4)         | 38 (29.5)        | 31 (33.7)                | 25 (26.3)                   |
| ≥65 years, n (%)                        | 16 (50.0)        | 24 (70.6)       | 12 (44.4)                | 18 (69.2)                   | 82 (62.6)         | 91 (70.5)        | 61 (66.3)                | 70 (73.7)                   |
| Sex, n (%)                              |                  |                 |                          |                             |                   |                  |                          |                             |
| Female                                  | 13 (40.6)        | 14 (41.2)       | 12 (44.4)                | 10 (38.5)                   | 72 (55.0)         | 54 (41.9)        | 51 (55.4)                | 42 (44.2)                   |
| Male                                    | 19 (59.4)        | 20 (58.8)       | 15 (55.6)                | 16 (61.5)                   | 59 (45.0)         | 75 (58.1)        | 41 (44.6)                | 53 (55.8)                   |
| Ethnicity, n (%)                        |                  |                 |                          |                             |                   |                  |                          |                             |
| Hispanic or Latino                      | 3 (9.4)          | 0               | 3 (11.1)                 | 0                           | 8 (6.1)           | 16 (12.4)        | 4 (4.3)                  | 10 (10.5)                   |
| Not Hispanic or Latino                  | 29 (90.6)        | 34 (100.0)      | 24 (88.9)                | 26 (100.0)                  | 123 (93.9)        | 112 (86.8)       | 88 (95.7)                | 84 (88.4)                   |
| Race, n (%)                             |                  |                 |                          |                             |                   |                  |                          |                             |
| White                                   | 20 (62.5)        | 27 (79.4)       | 16 (59.3)                | 22 (84.6)                   | 92 (70.2)         | 99 (76.7)        | 62 (67.4)                | 76 (80.0)                   |
| Black or African American               | 9 (28.1)         | 6 (17.6)        | 8 (29.6)                 | 4 (15.4)                    | 32 (24.4)         | 24 (18.6)        | 25 (27.2)                | 16 (16.8)                   |
| American Indian or Alaskan Native       | 1 (3.1)          | 0               | 1 (3.7)                  | 0                           | 1 (0.8)           | 1 (0.8)          | 1 (1.1)                  | 1 (1.1)                     |
| Asian                                   | 2 (6.3)          | 1 (2.9)         | 2 (7.4)                  | 0                           | 5 (3.8)           | 4 (3.1)          | 4 (4.3)                  | 2 (2.1)                     |
| Weight (kg), mean (SD)                  | 92.7 (18.8)      | 92.9 (24.0)     | 90.01 (18.9)             | 95.7 (23.6)                 | 81.7 (20.4)       | 81.0 (18.9)      | 81.6 (21.5)              | 82.1 (18.9)                 |
| BMI (kg/m <sup>2</sup> ), mean (SD)     | 31.5 (5.2)       | 31.5 (6.3)      | 31.0 (5.7)               | 32.5 (5.7)                  | 29.6 (6.9)        | 28.3 (5.6)       | 29.5 (7.2)               | 28.9 (5.7)                  |
| 6MWD (m), mean (SD)                     | 297.2 (110.1)    | 297.7 (91.8)    | 302.7 (108.8)            | 327.7 (104.8)               | 243.5 (98.0)      | 256.5 (91.9)     | 275.3 (96.4)             | 250.6 (110.4)               |
| NT-proBNP (pg/mL), mean (SD)            | 461.9 (652.6)    | 737.7 (1535.1)  | 309.7 (362.8)            | 364.3 (513.2)               | 2203.6 (3461.5)   | 2087.2 (3398.3)  | 1613.8 (2474.0)          | 3868.2 (10561.4)            |
| PVR (WU), mean (SD)                     | 3.6 (0.2)        | 3.5 (0.3)       | 3.6 (0.2)                | 3.5 (0.3)                   | 7.1 (2.8)         | 6.7 (2.7)        | 6.9 (2.8)                | 6.4 (2.5)                   |
| mPAP (mmHg), mean (SD)                  | 31.1 (4.4)       | 30.4 (4.5)      | 31.4 (4.7)               | 30.7 (4.9)                  | 38.7 (8.7)        | 37.4 (8.6)       | 39.1 (9.3)               | 36.6 (8.2)                  |
| PCWP (mmHg), mean (SD)                  | 10.8 (3.2)       | 11.0 (2.9)      | 10.8 (3.3)               | 10.7 (3.1)                  | 9.9 (3.5)         | 9.2 (3.5)        | 9.9 (3.6)                | 9.3 (3.4)                   |
| Time since diagnosis (years), mean (SD) | 0.42 (0.58)      | 1.03 (2.33)     | 0.73 (0.62)              | 1.48 (2.63)                 | 0.57 (1.26)       | 0.41 (0.83)      | 0.93 (1.26)              | 0.76 (0.95)                 |
| Current ILD Diagnosis, n (%)            |                  |                 |                          |                             |                   |                  |                          |                             |
| IIP                                     | 14 (43.8)        | 19 (55.9)       | 12 (44.4)                | 14 (53.8)                   | 51 (38.9)         | 62 (48.1)        | 35 (38.0)                | 47 (49.5)                   |
| CHP                                     | 0                | 1 (2.9)         | 0                        | 1 (3.8)                     | 10 (7.6)          | 8 (6.2)          | 7 (7.6)                  | 5 (5.3)                     |
| Occupational lung disease               | 0                | 0               | 0                        | 0                           | 5 (3.8)           | 1 (0.8)          | 3 (3.3)                  | 1 (1.1)                     |

|       |           |          |          |          |           |           |           |           |
|-------|-----------|----------|----------|----------|-----------|-----------|-----------|-----------|
| CPFE  | 8 (25.0)  | 9 (26.5) | 6 (22.2) | 7 (26.9) | 34 (26.0) | 31 (24.0) | 23 (25.0) | 22 (23.2) |
| CTD   | 10 (31.3) | 5 (14.7) | 9 (33.3) | 4 (15.4) | 30 (22.9) | 27 (20.9) | 24 (26.1) | 20 (21.1) |
| Other | 0         | 0        | 0        | 0        | 1 (0.8)   | 0         | 0         | 0         |

6MWD, 6-minute walk distance; BMI, body mass index; CHP, chronic hypersensitivity pneumonia; CPFE, combined pulmonary fibrosis and emphysema; CTD, connective tissue disorder; IIP, idiopathic interstitial pneumonia; iTre, inhaled treprostinil; NT-proBNP, N-terminal prohormone of brain natriuretic peptide; OLE; open-label extension; mPAP, mean pulmonary artery pressure; PBO, placebo; PCWP, pulmonary capillary wedge pressure; PVR, pulmonary vascular resistance; RCT, randomized controlled trial; WU, Wood unit

**Table S2. Baseline Demographics, PVR ≤5 WU and >5 WU**

|                                         | ≤5 WU            |                 |                          |                             | >5 WU            |                 |                          |                             |
|-----------------------------------------|------------------|-----------------|--------------------------|-----------------------------|------------------|-----------------|--------------------------|-----------------------------|
|                                         | RCT iTre<br>n=69 | RCT PBO<br>n=81 | OLE<br>iTre→iTre<br>n=55 | OLE<br>PBO→<br>iTre<br>n=64 | RCT iTre<br>n=94 | RCT PBO<br>n=82 | OLE<br>iTre→iTre<br>n=64 | OLE<br>PBO→<br>iTre<br>n=57 |
| Age, years, mean (SD)                   | 65.9 (11.3)      | 67.9 (10.6)     | 66.2 (10.9)              | 68.3 (10.9)                 | 65.3 (13.7)      | 66.9 (11.8)     | 65.4 (14.6)              | 67.8 (11.6)                 |
| <65 years, n (%)                        | 29 (42.0)        | 23 (28.4)       | 22 (40.0)                | 18 (28.1)                   | 36 (38.3)        | 25 (30.5)       | 24 (37.5)                | 15 (26.3)                   |
| ≥65 years, n (%)                        | 40 (58.0)        | 58 (71.6)       | 33 (60.0)                | 46 (71.8)                   | 58 (61.7)        | 57 (69.5)       | 40 (62.5)                | 42 (73.7)                   |
| Sex, n (%)                              |                  |                 |                          |                             |                  |                 |                          |                             |
| Female                                  | 29 (42.0)        | 35 (43.2)       | 23 (41.8)                | 27 (42.2)                   | 56 (59.6)        | 33 (40.2)       | 40 (62.5)                | 25 (43.9)                   |
| Male                                    | 40 (58.0)        | 46 (56.8)       | 32 (58.2)                | 37 (57.8)                   | 38 (40.4)        | 49 (59.8)       | 24 (37.5)                | 32 (56.1)                   |
| Ethnicity, n (%)                        |                  |                 |                          |                             |                  |                 |                          |                             |
| Hispanic or Latino                      | 3 (4.3)          | 6 (7.4)         | 3 (5.5)                  | 3 (4.7)                     | 8 (8.5)          | 10 (12.2)       | 4 (6.3)                  | 7 (12.3)                    |
| Not Hispanic or Latino                  | 66 (95.7)        | 75 (92.6)       | 52 (94.5)                | 61 (95.3)                   | 86 (91.5)        | 71 (86.6)       | 60 (93.8)                | 49 (86.0)                   |
| Missing                                 | 0                | 0               | 0                        | 0                           | 0                | 1 (1.2)         | 0                        | 1 (1.8)                     |
| Race, n (%)                             |                  |                 |                          |                             |                  |                 |                          |                             |
| White                                   | 46 (66.7)        | 66 (81.5)       | 36 (65.5)                | 54 (84.4)                   | 66 (70.2)        | 60 (73.2)       | 42 (65.6)                | 44 (77.2)                   |
| Black or African American               | 16 (23.2)        | 13 (16.0)       | 13 (23.6)                | 10 (15.6)                   | 25 (26.6)        | 17 (20.7)       | 20 (31.3)                | 10 (17.5)                   |
| American Indian or Alaskan Native       | 2 (2.9)          | 0               | 2 (3.6)                  | 0                           | 0                | 1 (1.2)         | 0                        | 1 (1.8)                     |
| Asian                                   | 5 (7.2)          | 1 (1.2)         | 4 (7.3)                  | 0                           | 2 (2.1)          | 4 (4.9)         | 2 (3.1)                  | 2 (3.5)                     |
| Missing                                 | 0                | 1 (1.2)         | 0                        | 0                           | 1 (1.1)          | 0               | 0                        | 0                           |
| Weight (kg), mean (SD)                  | 91.5 (20.6)      | 89.3 (22.2)     | 91.1 (20.8)              | 91.3 (21.2)                 | 78.3 (18.7)      | 77.8 (17.2)     | 77.1 (19.8)              | 78.1 (17.9)                 |
| Height (cm), mean (SD)                  | 170.4 (10.7)     | 170.0 (9.6)     | 170.5 (11.0)             | 170.3 (10.1)                | 165.4 (9.6)      | 167.9 (9.2)     | 165.3 (9.2)              | 166.6 (8.9)                 |
| BMI (kg/m <sup>2</sup> ), mean (SD)     | 31.4 (6.0)       | 30.5 (6.1)      | 31.2 (6.0)               | 31.1 (5.6)                  | 28.9 (6.8)       | 27.5 (5.3)      | 28.6 (7.5)               | 28.1 (5.8)                  |
| 6MWD (m), mean (SD)                     | 281.0 (105.7)    | 284.5 (90.7)    | 291.5 (111.2)            | 301.1 (106.3)               | 234.2 (95.6)     | 246.0 (92.1)    | 273.2 (88.0)             | 228.3 (109.0)               |
| NT-proBNP (pg/mL), mean (SD)            | 758.1 (1207.6)   | 1117.5 (2156.6) | 525.9 (763.6)            | 1329.4 (3771.6)             | 2685.2 (3896.0)  | 2500.2 (3789.3) | 2011.0 (2827.6)          | 5120.3 (12964.7)            |
| PVR (WU), mean (SD)                     | 4.0 (0.5)        | 4.1 (0.6)       | 4.0 (0.5)                | 4.1 (0.6)                   | 8.1 (2.6)        | 7.9 (2.6)       | 8.0 (2.6)                | 7.6 (2.6)                   |
| mPAP (mmHg), mean (SD)                  | 32.2 (4.8)       | 31.7 (5.5)      | 32.3 (4.8)               | 31.7 (5.4)                  | 41.0 (8.9)       | 40.2 (8.6)      | 41.8 (9.6)               | 39.3 (8.6)                  |
| PCWP (mmHg), mean (SD)                  | 10.6 (3.3)       | 10.2 (3.0)      | 10.5 (3.4)               | 10.2 (3.0)                  | 9.7 (3.5)        | 8.9 (3.9)       | 9.8 (3.7)                | 9.0 (3.7)                   |
| Time since diagnosis (years), mean (SD) | 0.66 (1.43)      | 0.65 (1.61)     | 0.90 (1.23)              | 1.02 (1.78)                 | 0.46 (0.91)      | 0.43 (0.92)     | 0.88 (1.08)              | 0.80 (1.08)                 |
| Current ILD Diagnosis, n (%)            |                  |                 |                          |                             |                  |                 |                          |                             |
| IIP                                     | 29 (42.0)        | 43 (53.1)       | 22 (40.0)                | 35 (54.7)                   | 36 (38.3)        | 38 (46.3)       | 25 (39.1)                | 26 (45.6)                   |

|                           |           |           |           |           |           |           |           |           |
|---------------------------|-----------|-----------|-----------|-----------|-----------|-----------|-----------|-----------|
| CHP                       | 2 (2.9)   | 2 (2.5)   | 2 (3.6)   | 1 (1.6)   | 8 (8.5)   | 7 (8.5)   | 5 (7.8)   | 5 (8.8)   |
| Occupational lung disease | 2 (2.9)   | 0         | 2 (3.6)   | 0         | 3 (3.2)   | 1 (1.2)   | 1 (1.6)   | 1 (1.8)   |
| CPFE                      | 16 (23.2) | 19 (23.5) | 12 (21.8) | 14 (21.9) | 26 (27.7) | 21 (25.6) | 17 (26.6) | 15 (26.3) |
| CTD                       | 20 (29.0) | 17 (21.0) | 17 (30.9) | 14 (21.9) | 20 (21.3) | 15 (18.3) | 16 (25.0) | 10 (17.5) |
| Other                     | 0         | 0         | 0         | 0         | 1 (1.1)   | 0         | 0         | 0         |

6MWD, 6-minute walk distance; BMI, body mass index; iTre, inhaled treprostinil; mPAP, mean pulmonary artery pressure; NT-proBNP, N-terminal prohormone of brain natriuretic peptide; OLE, open-label extension; PBO, placebo; PCWP, pulmonary capillary wedge pressure; PVR, pulmonary vascular resistance; RCT, randomized controlled trial; WU, Wood unit

**Table S3:** Clinical worsening events in the INCREASE RCT by PVR

| Clinical worsening event, n (%) | PVR <4 WU                   |                | PVR ≥4 WU                    |                 |
|---------------------------------|-----------------------------|----------------|------------------------------|-----------------|
|                                 | Inhaled treprostinil (n=32) | Placebo (n=34) | Inhaled treprostinil (n=131) | Placebo (n=129) |
| Any first event                 | 3 (9.4)                     | 8 (23.5)       | 34 (26.0)                    | 46 (35.7)       |
| Cardiopulmonary hospitalization | 0                           | 5 (14.7)       | 18 (13.7)                    | 19 (14.7)       |
| >15% decrease in 6MWD           | 3 (9.4)                     | 2 (5.9)        | 10 (7.6)                     | 24 (18.6)       |
| Lung transplantation            | 0                           | 0              | 2 (1.5)                      | 0               |
| Death                           | 0                           | 1 (2.9)        | 4 (3.1)                      | 3 (2.3)         |
| Clinical worsening event, n (%) | PVR ≤5 WU                   |                | PVR >5 WU                    |                 |
|                                 | Inhaled treprostinil (n=69) | Placebo (n=81) | Inhaled treprostinil (n=32)  | Placebo (n=34)  |
| Any first event                 | 13 (18.8)                   | 20 (24.7)      | 24 (25.5)                    | 34 (41.5)       |
| Cardiopulmonary hospitalization | 5 (7.2)                     | 10 (12.3)      | 13 (13.8)                    | 14 (17.1)       |
| >15% decrease in 6MWD           | 6 (8.7)                     | 8 (9.9)        | 7 (7.4)                      | 18 (22.0)       |
| Lung transplantation            | 1 (1.4)                     | 0              | 1 (1.1)                      | 0               |
| Death                           | 1 (1.4)                     | 2 (2.5)        | 3 (3.2)                      | 2 (2.4)         |

6MWD, 6-minute walking distance; PVR, pulmonary vascular resistance; RCT, randomized controlled trial; WU, Wood units

**Table S4:** Clinical worsening or lung disease exacerbation events in the INCREASE RCT by mPAP

| Clinical worsening or exacerbation event, n (%) | mPAP <35 mmHg               |                | mPAP ≥35 mmHg               |                |
|-------------------------------------------------|-----------------------------|----------------|-----------------------------|----------------|
|                                                 | Inhaled treprostinil (n=74) | Placebo (n=80) | Inhaled treprostinil (n=89) | Placebo (n=83) |
| Any first event                                 | 23 (31.1)                   | 39 (48.8)      | 36 (40.4)                   | 40 (48.2)      |
| Cardiopulmonary hospitalization                 | 3 (4.1)                     | 1 (1.3)        | 2 (2.2)                     | 3 (3.6)        |
| >15% decrease in 6MWD                           | 3 (4.1)                     | 5 (6.3)        | 4 (4.5)                     | 8 (9.6)        |
| Lung transplantation                            | 1 (1.4)                     | 0              | 1 (1.1)                     | 0              |
| Death                                           | 2 (2.7)                     | 1 (1.3)        | 2 (2.2)                     | 2 (2.4)        |
| Exacerbation of underlying lung disease         | 14 (18.9)                   | 32 (40)        | 27 (30.3)                   | 27 (32.5)      |

6MWD, 6-minute walking distance; mPAP, mean pulmonary arterial pressure; RCT, randomized controlled trial

**Table S5.** Post hoc Bayesian analysis of the phase 3 INCREASE trial for clinical worsening

| Prior               | Prior median HR | Posterior median HR (95% credible interval) | Probability HR <1 | Probability HR <0.8 |
|---------------------|-----------------|---------------------------------------------|-------------------|---------------------|
| <b>PVR &lt;4 WU</b> |                 |                                             |                   |                     |
| Noninformative      | N/A             | 0.34 (0.07, 1.24)                           | 94.81%            | 89.94%              |
| Optimistic          | 0.67            | 0.64 (0.44, 0.92)                           | 99.15%            | 88.60%              |
| Neutral             | 1               | 0.75 (0.39, 1.45)                           | 80.47%            | 57.40%              |
| Pessimistic         | 1.3             | 1.16 (0.79, 1.68)                           | 22.61%            | 2.66%               |
| <b>PVR ≤5 WU</b>    |                 |                                             |                   |                     |
| Noninformative      | N/A             | 0.66 (0.31, 1.33)                           | 87.75%            | 70.69%              |
| Optimistic          | 0.67            | 0.67 (0.47, 0.94)                           | 98.99%            | 85.03%              |
| Neutral             | 1               | 0.79 (0.47, 1.34)                           | 80.65%            | 51.08%              |
| Pessimistic         | 1.3             | 1.10 (0.79, 1.56)                           | 28.31%            | 3.19%               |

HR, hazard ratio; N/A, not applicable; PVR, pulmonary vascular resistance; WU, Wood unit

**Table S6.** Post hoc Bayesian analysis of the phase 3 INCREASE trial for lung disease exacerbations

| Prior               | Prior median HR | Posterior median HR (95% credible interval) | Probability HR <1 | Probability HR <0.8 |
|---------------------|-----------------|---------------------------------------------|-------------------|---------------------|
| <b>PVR &lt;4 WU</b> |                 |                                             |                   |                     |
| Noninformative      | N/A             | 0.54 (0.18, 1.44)                           | 88.72%            | 77.97%              |
| Optimistic          | 0.67            | 0.65 (0.45, 0.94)                           | 98.93%            | 86.22%              |
| Neutral             | 1               | 0.79 (0.43, 1.45)                           | 77.45%            | 51.25%              |
| Pessimistic         | 1.3             | 1.15 (0.80, 1.65)                           | 22.53%            | 2.53%               |
| <b>PVR ≤5 WU</b>    |                 |                                             |                   |                     |
| Noninformative      | N/A             | 0.42 (0.22, 0.78)                           | 99.67%            | 97.86%              |
| Optimistic          | 0.67            | 0.59 (0.42, 0.82)                           | 99.95%            | 96.63%              |
| Neutral             | 1               | 0.59 (0.36, 0.95)                           | 98.52%            | 89.46%              |
| Pessimistic         | 1.3             | 0.93 (0.67, 1.29)                           | 66.33%            | 17.88%              |

HR, hazard ratio; N/A, not applicable; PVR, pulmonary vascular resistance; WU, Wood unit

**Table S7.** Clinical events in the INCREASE OLE by Baseline PVR

| Clinical event                  | Hazard ratio (95% CI) for early treatment |                                    |
|---------------------------------|-------------------------------------------|------------------------------------|
|                                 | PVR <4 WU                                 | PVR ≥4 WU                          |
| Cardiopulmonary hospitalization | 0.46 (0.17, 1.24); <i>P</i> = 0.11        | 1.07 (0.64, 1.78); <i>P</i> = 0.80 |
| Lung disease exacerbation       | 0.77 (0.35, 1.7); <i>P</i> = 0.51         | 0.68 (0.46, 1.0); <i>P</i> = 0.04  |
| Death                           | 0.62 (0.15, 2.49); <i>P</i> = 0.49        | 0.7 (0.41, 1.19), <i>P</i> = 0.19  |
| Clinical event                  |                                           |                                    |
|                                 | PVR ≤5 WU                                 | PVR >5 WU                          |
| Cardiopulmonary hospitalization | 0.81 (0.39, 1.68); <i>P</i> = 0.57        | 0.95 (0.53, 1.70); <i>P</i> = 0.87 |
| Lung disease exacerbation       | 0.55 (0.33, 0.93); <i>P</i> = 0.02        | 0.84 (0.52, 1.33), <i>P</i> = 0.45 |
| Death                           | 0.50 (0.21, 1.21); <i>P</i> = 0.12        | 0.77 (0.42, 1.43); <i>P</i> = 0.41 |

CI, confidence interval; OLE, open-label extension; PVR, pulmonary vascular resistance; WU, Wood unit



**Figure S1:** 6MWD change in the INCREASE OLE, mPAP <35 mmHg

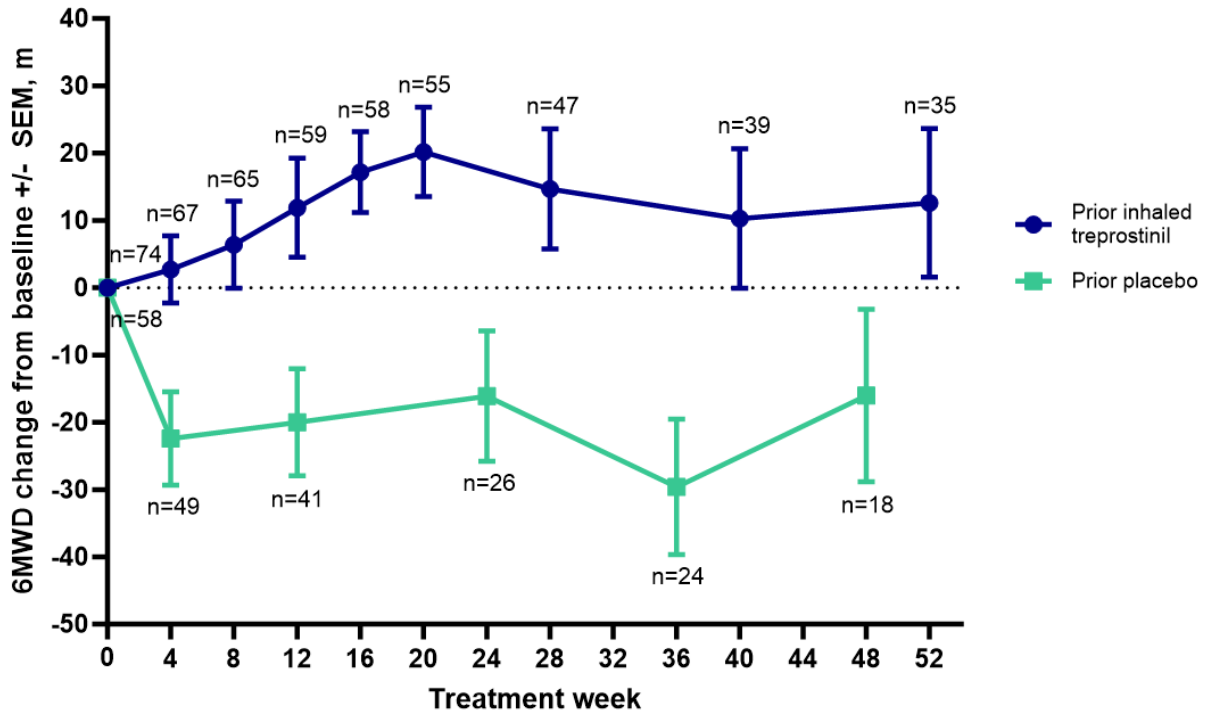

6MWD, 6-minute walking distance; mPAP, mean pulmonary arterial pressure; OLE, open-label extension, SEM, standard error of measurement
